# Supplementary material for: Quantitative V gene–targeted T cell receptor sequencing as a biomarker in type 1 diabetes
Source: JCI journal article supplement (doi:10.1172/jci.insight.186004), 2025-12-18
Supplement: sd1 [file 1]

# Supplemental Figure 1

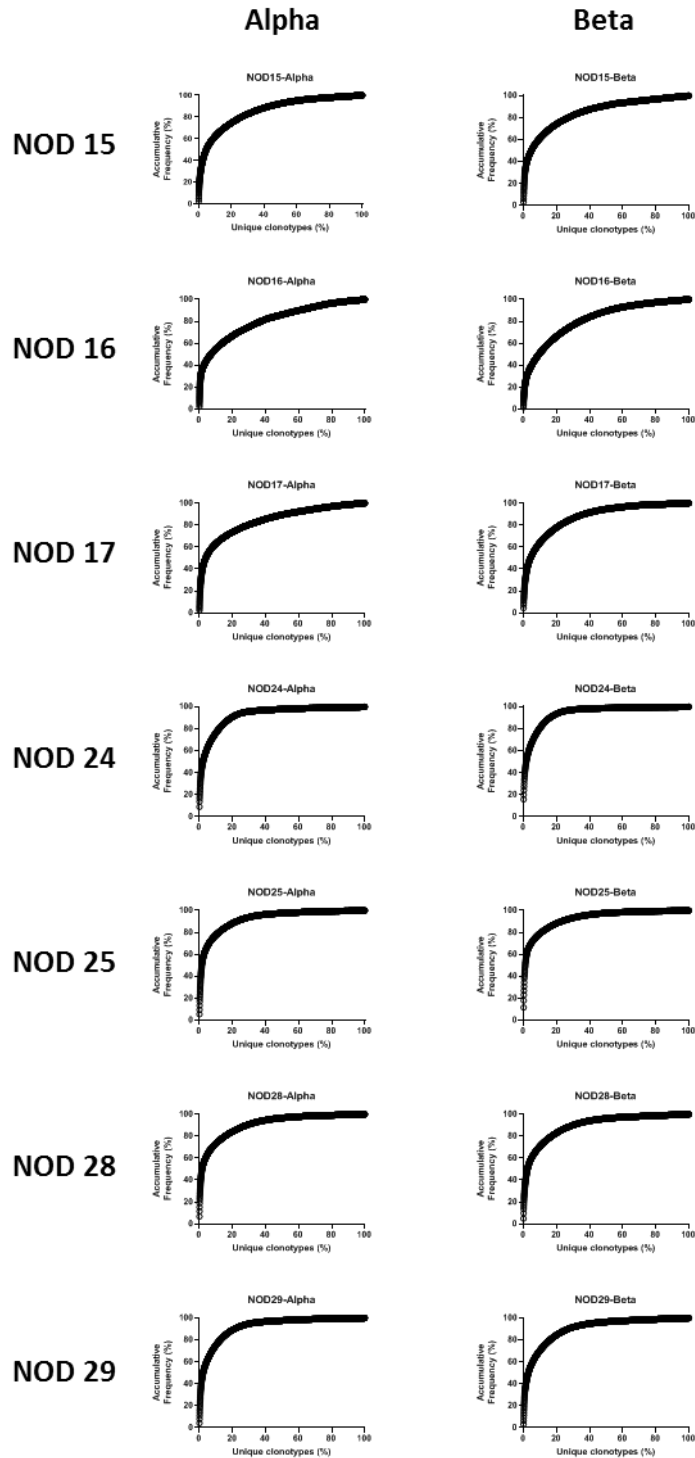

**Supplemental Figure 1: Accumulative frequency of unique TCR clonotypes.** Each graph depicts TCR alpha or beta repertoires in the islets of individual NOD mice studied. Individual unique TCR clonotypes are aligned in X-axis (highest to lowest clonotypes), and the accumulative frequencies of all clonotypes that are more frequent than any given clonotypes are plotted in Y-axis. Sharp slopes in the first few percent of unique clonotypes demonstrate the deflect prevalence of those clonotypes.

# Supplemental Figure 2

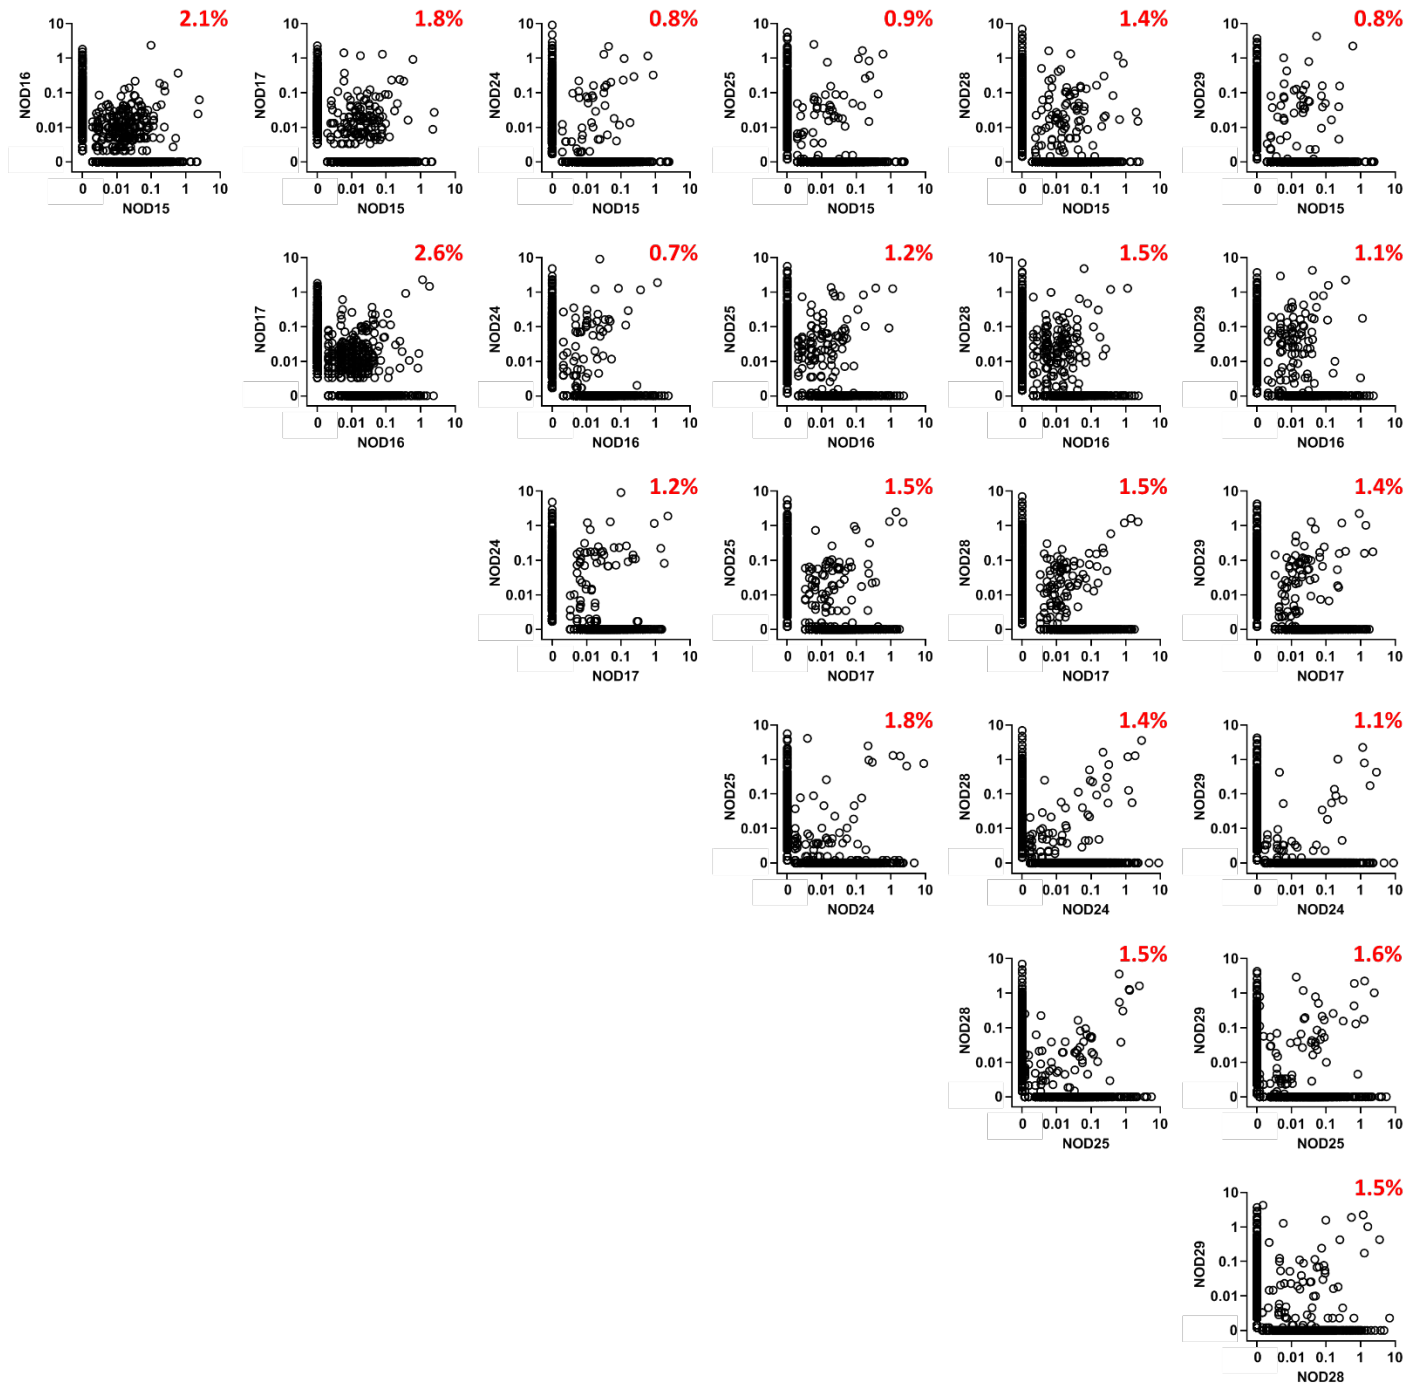

**Supplemental Figure 2: Comparison of TCR alpha clonotype frequencies in the islets.** Each graph depicts TCR alpha repertoires in the islets of any two given NOD mice studied of the 21 possible pairings. Symbols represent frequency of each unique clonotype of one mouse in X-axis and that of the other mouse in Y-axis. Percentages of clonotypes that were detected in the islets of both mice are shown in red at the right-top corner of each graph.

# Supplemental Figure 3

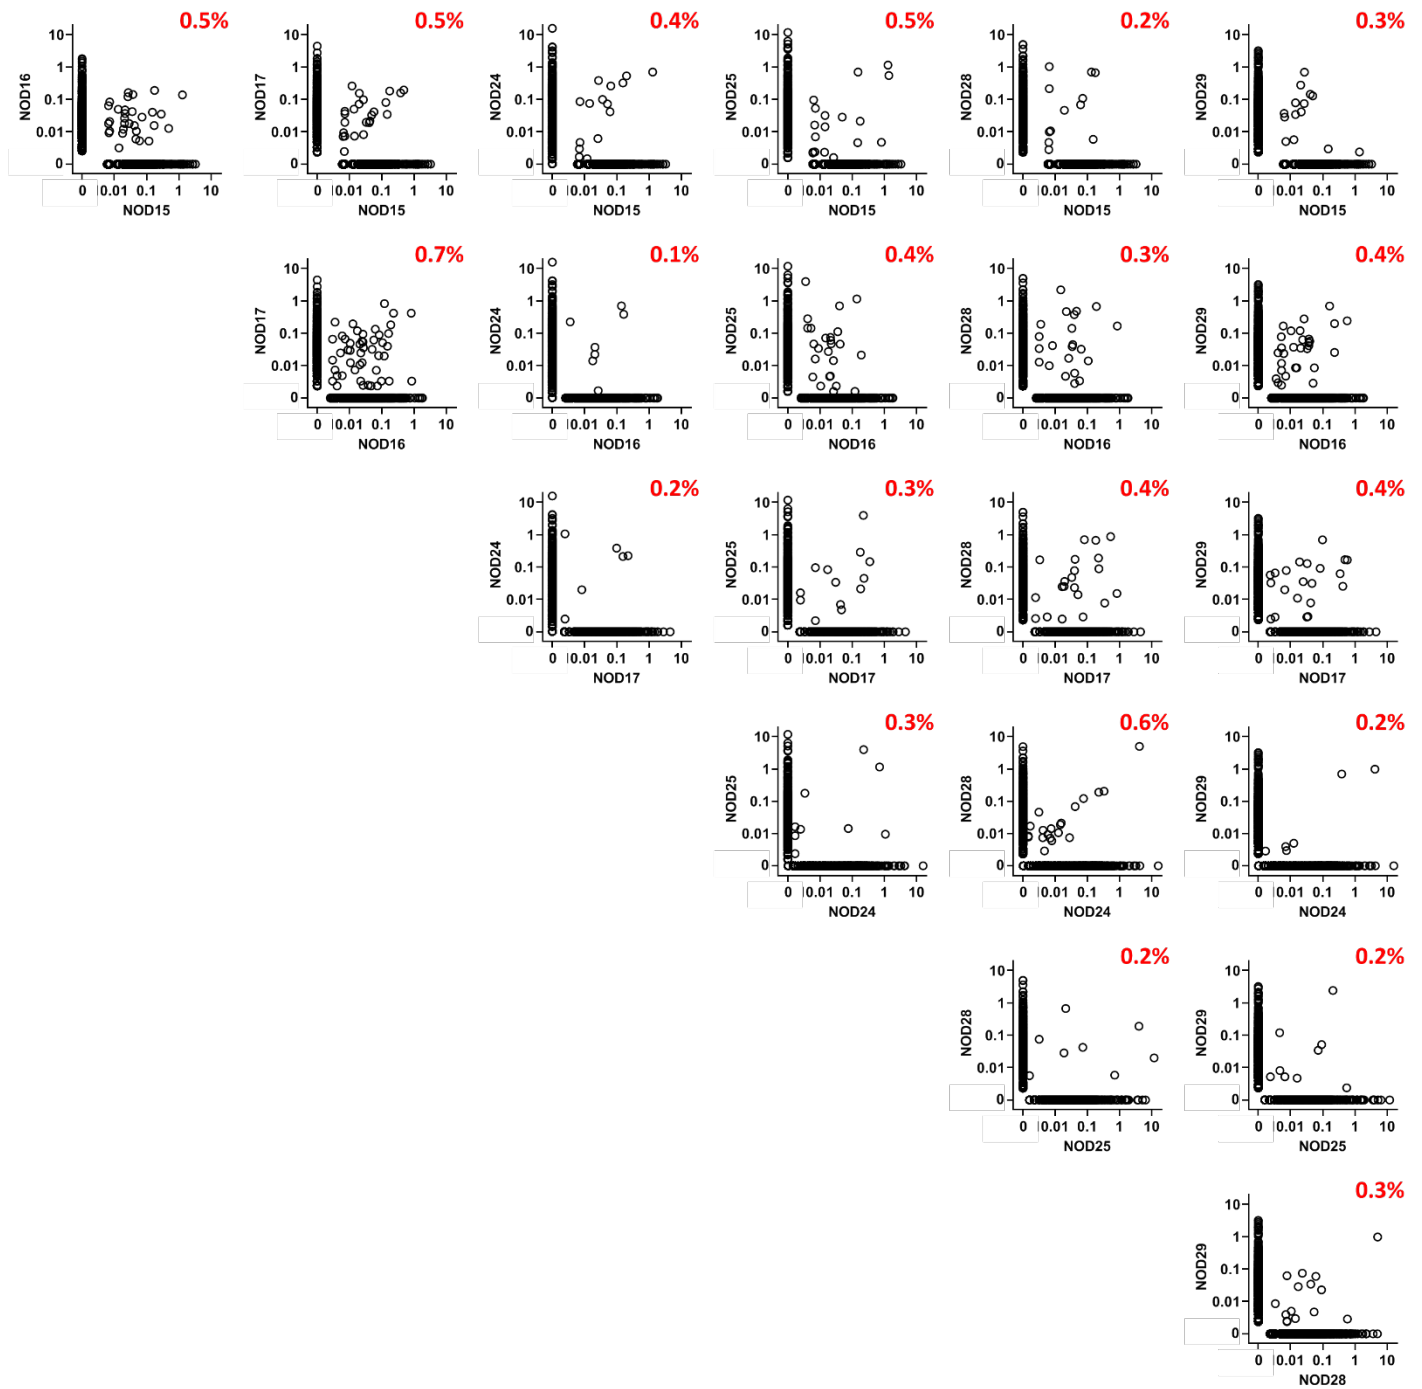

**Supplemental Figure 3: Comparison of TCR beta clonotype frequencies in the islets.** Each graph depicts TCR beta repertoires in the islets of any two given NOD mice studied of the 21 possible pairings. Symbols represent frequency of each unique clonotype of one mouse in X-axis and that of the other mouse in Y-axis. Percentages of clonotypes that were detected in the islets of both mice are shown in red at the right-top corner of each graph.

# Supplemental Figure 4

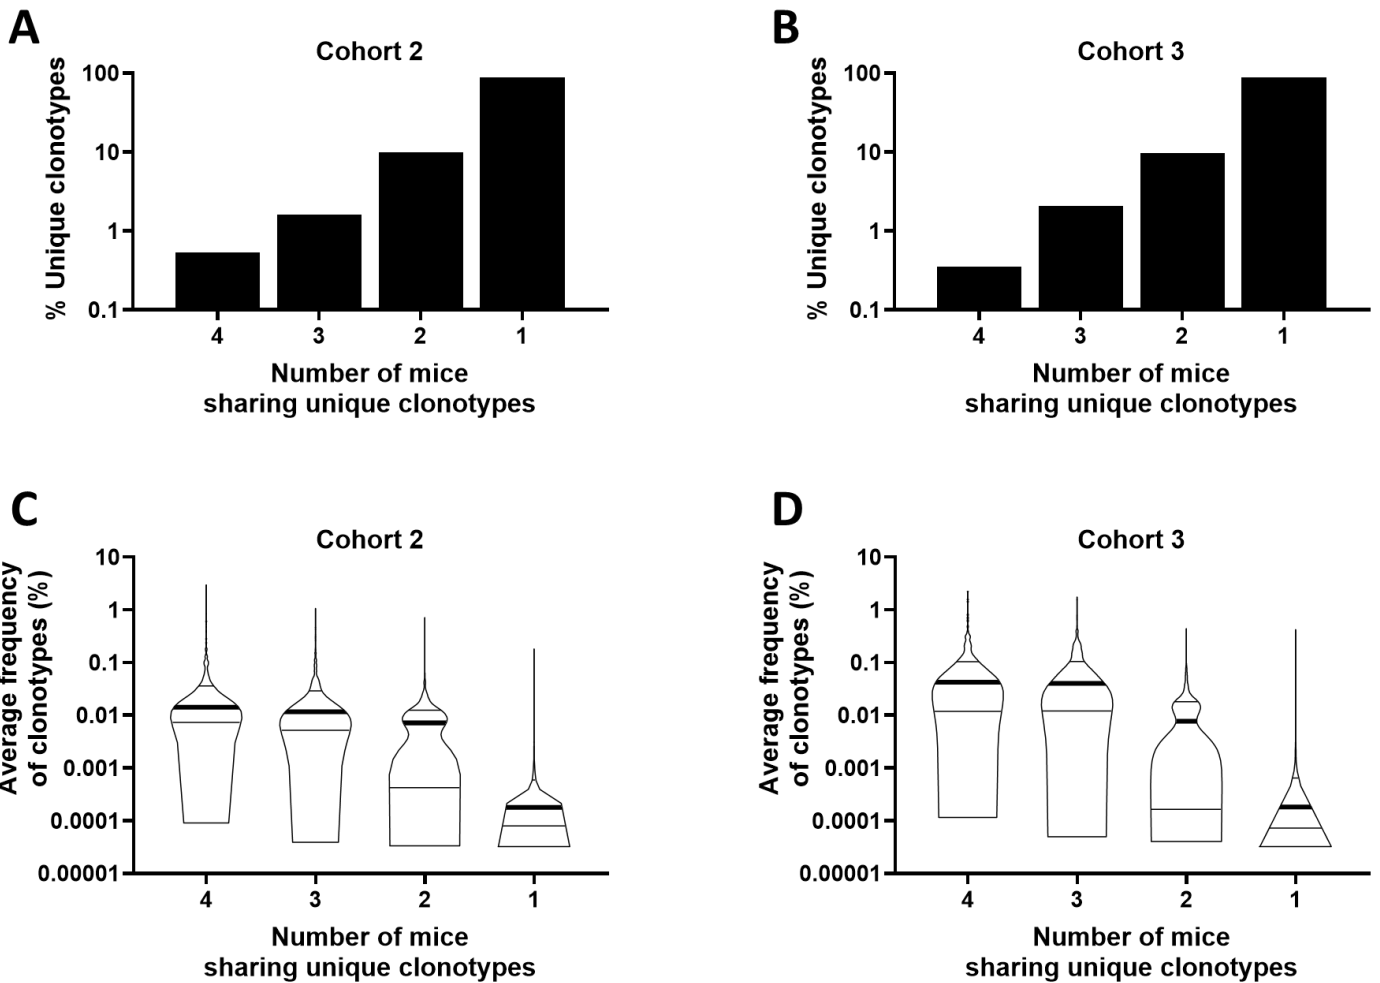

**Supplemental Figure 4: Frequencies of TCR clonotypes shared between animals in cohorts 2 and 3.** (A) and (B) Percentages of TCR alpha clonotypes detected from different numbers of mice are plotted. Approximately 90% of clonotypes were detected from only a single mouse. (C) and (D) Frequencies of TCR alpha clonotypes detected from different numbers of mice are shown in violin plots. Frequencies of private clonotypes (i.e. detected from only a single mouse) are lower than public clonotypes (i.e. detected from multiple mice).

# Supplemental Figure 5

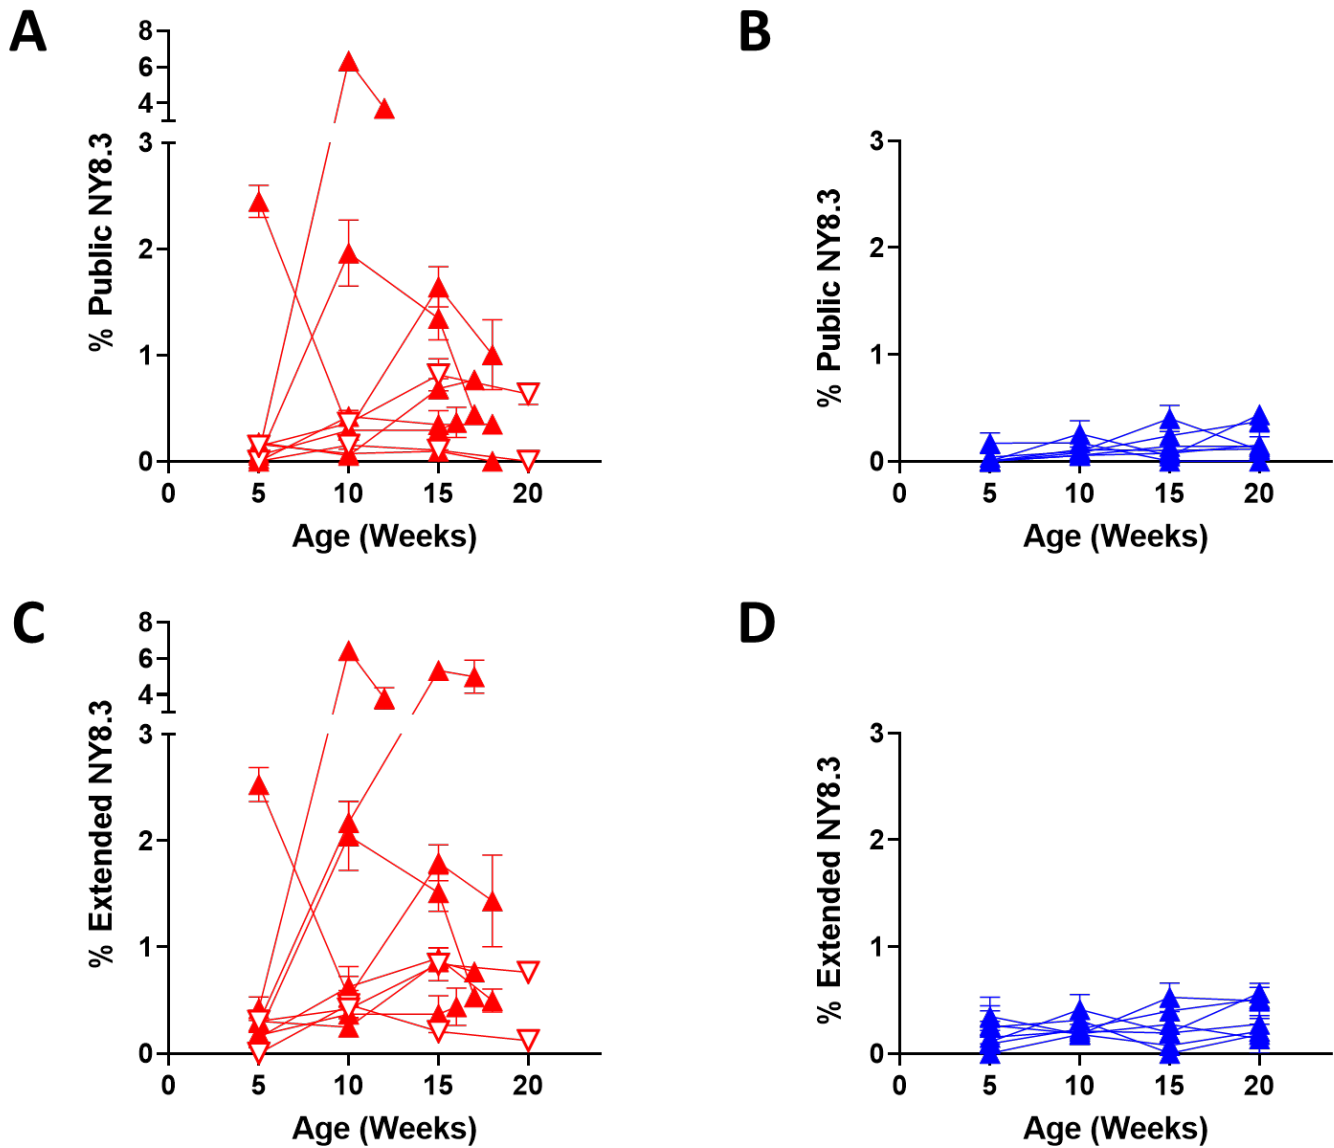

## Supplemental Figure 5: Longitudinal analysis of frequencies of public and extended NY8.3 clonotypes.

Frequencies of public NY8.3 (A and B) and extended NY8.3 clonotypes (C and D) in blood samples of nine NOD (A and C) and seven insulin-knockout NOD mice were determined using TRAV16-targeted sequencing. Symbols connected by lines represent data from each mouse. White inverse triangle symbols in panels A and C represent data from NOD mice that did not develop diabetes during the study period.

# Supplemental Figure 6

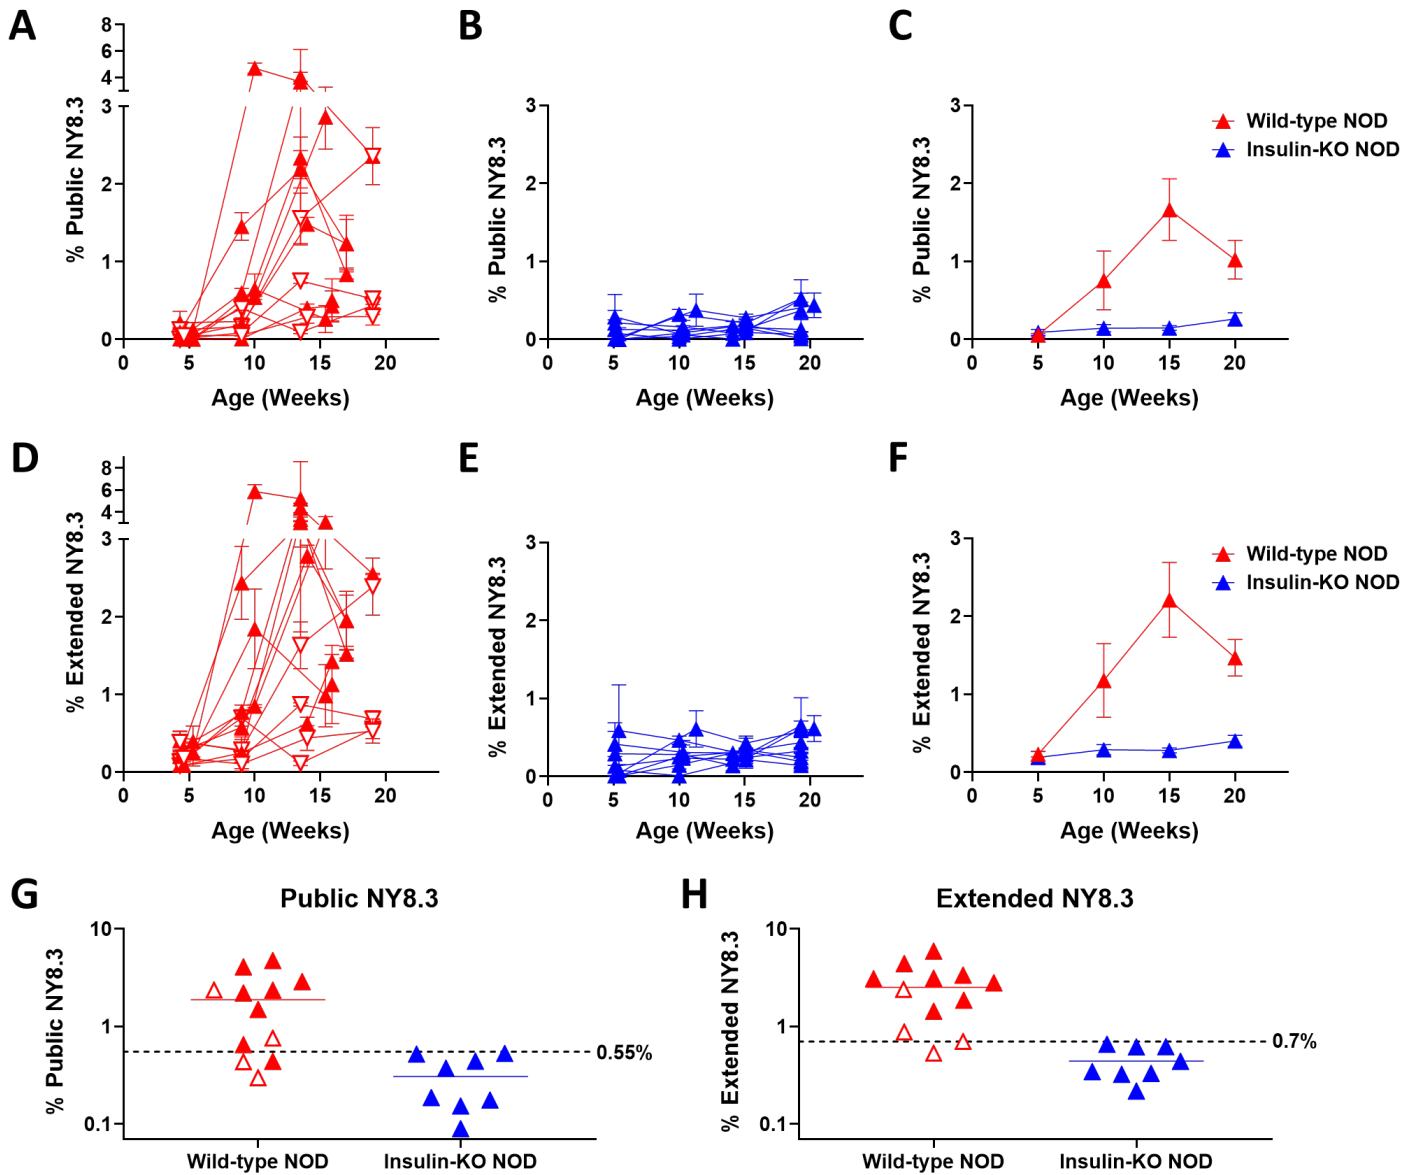

**Supplemental Figure 6: Longitudinal analysis of frequencies of public and extended NY8.3 clonotypes of the second cohorts.** Frequencies of public NY8.3 (A and B) and extended NY8.3 clonotypes (D and E) in blood samples of a cohort of 12 NOD (A and D) and 8 insulin-knockout NOD mice were determined using TRAV16-targeted sequencing. Mean values  $\pm$  standard errors of the public NY8.3 and extended NY8.3 clonotypes of these cohorts are shown in panels C and F, respectively. The highest values of individual mice during the study period are plotted for public NY8.3 (G) and extended NY8.3 (H). The dashed line is the cut-off value determined by the 99 percentile of highest values in insulin-KO mice. White inverse triangle symbols in panels A, D, G, and H represent data from NOD mice that did not develop diabetes during the study period.

# Supplemental Figure 7

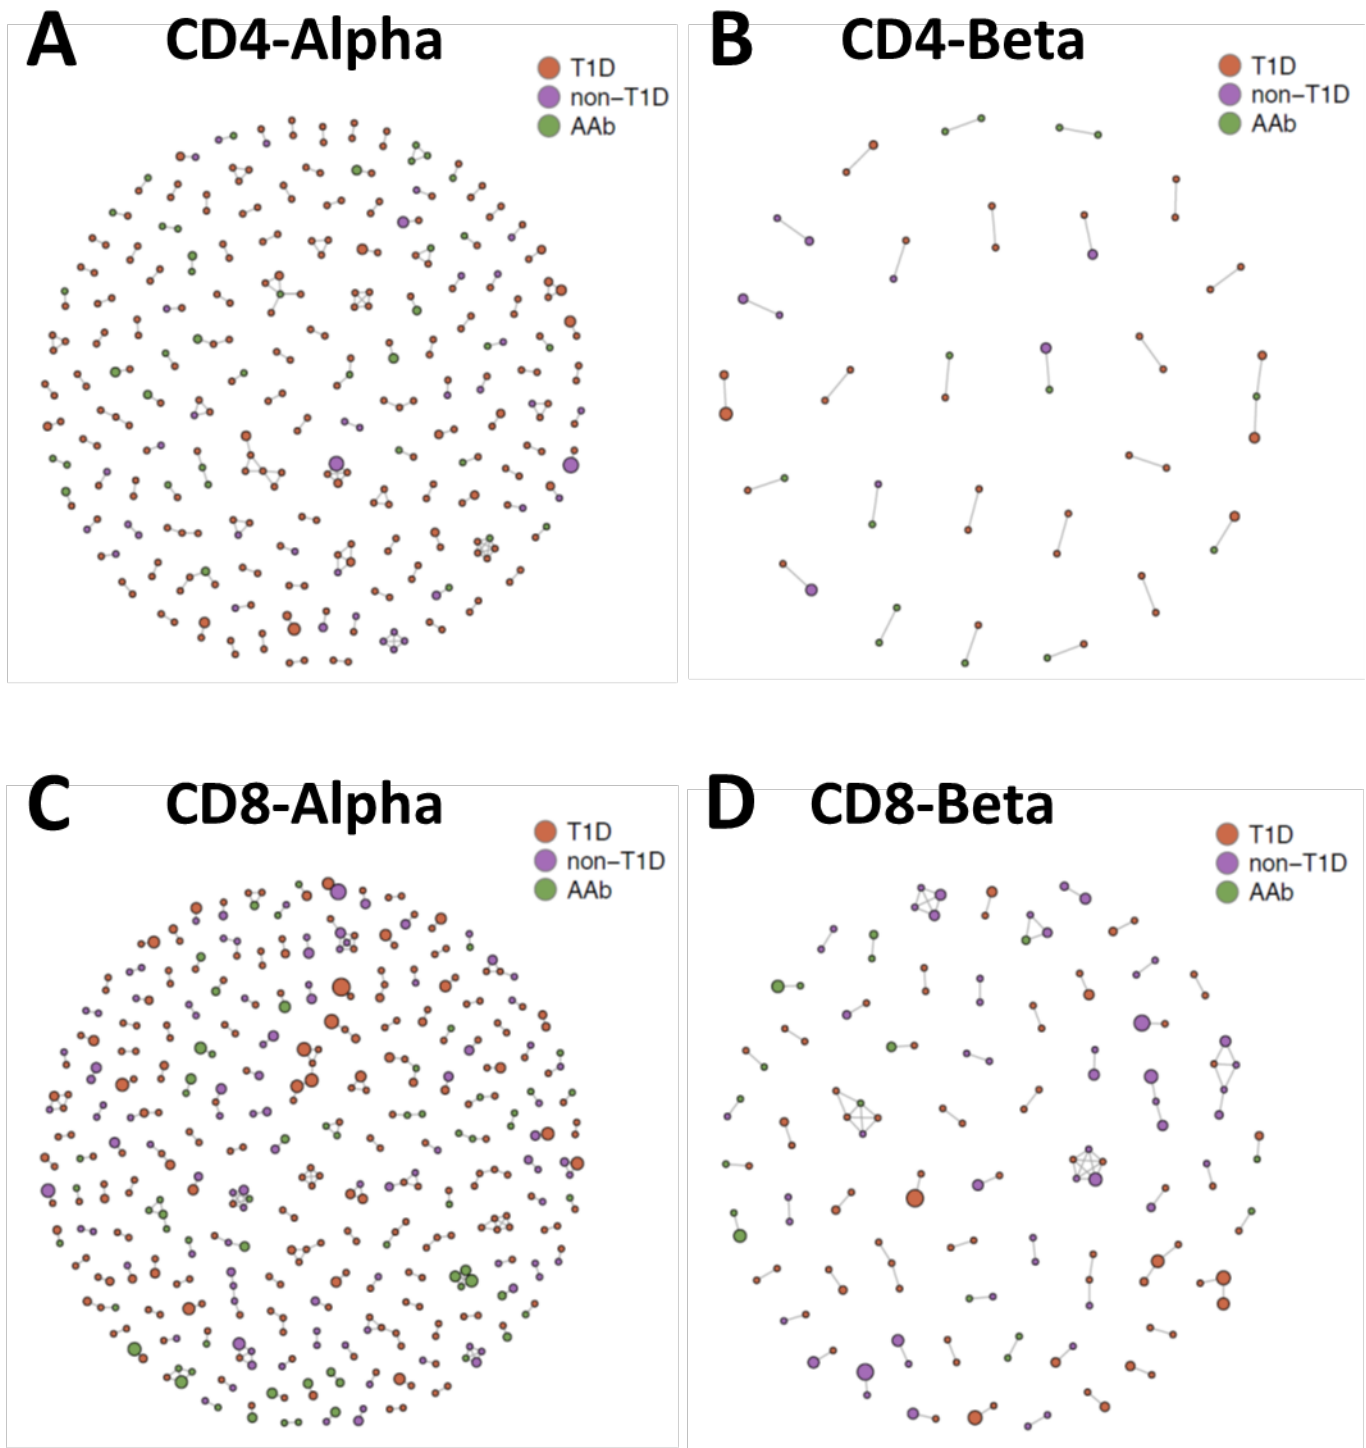

**Supplemental Figure 7: Clusters of TCR clonotypes.** TCR clonotypes detected from islets and pancreas tissues were analyzed for similarity using TCRdist. Each bubble represents a unique clonotype from each donor, which is connected to clonotypes having similar motifs. Size of bubbles represents the number of cells expressing a give clonotype.

# Supplemental Table 1

## Supplemental Table 1: Primers to generate whole TCR amplicons

### Alpha chain PCR products sequenced on 454 GSJR

| 1 <sup>st</sup> step PCR | Primer Name            | Primer Sequence                                                                            |
|--------------------------|------------------------|--------------------------------------------------------------------------------------------|
| Primer 1                 | MAC                    | GGGTGCTGTCCTGAGACCGAGGATC                                                                  |
| Primer 2                 | Universal Primer A Mix | Provided from SMARTer RACE cDNA amplification kit (Takara)                                 |
|                          |                        |                                                                                            |
| 2 <sup>nd</sup> step PCR | Primer Name            | Primer Sequence                                                                            |
| Primer 1                 | LibL_MIDsX_MAC         | CCATCTCATCCCTGCGTGTCTCCGACTCAG (454 adapter)-<br>XXXXX (barcode)-GTACACAGCAGGTTCTGGGTTCTGG |
| Primer 2                 | TitB-RACE              | CCTATCCCCTGTGTGCCTTGGCAGTCTCAG (454 adapter)-<br>AAGCAGTGGTATCAACGCAGAGT                   |

### Alpha chain PCR products sequenced on Illumina MiSEQ

| 1 <sup>st</sup> step PCR | Primer Name        | Primer Sequence                                                                                                                                                            |
|--------------------------|--------------------|----------------------------------------------------------------------------------------------------------------------------------------------------------------------------|
| Primer 1                 | MAC                | GGGTGCTGTCCTGAGACCGAGGATC                                                                                                                                                  |
| Primer 2                 | Illumina-UMI       | CAGACGTGTGCTCTTCCGATCT-NNNNNNNN (random 6-8mers)-<br>AAGCAGTGGTATCAACGCAGAGT                                                                                               |
| Primer 3                 | Illumina-short     | CAGACGTGTGCTCTTCCGATCT                                                                                                                                                     |
|                          |                    |                                                                                                                                                                            |
| 2 <sup>nd</sup> step PCR | Primer Name        | Primer Sequence                                                                                                                                                            |
| Primer 1                 | Illumina-MAC-MIDsY | AATGATACGGCGACCACCGAGATCT (Illumina adapter)-<br>ACACTCTTCCCTACACGACGCTCTTCCGATCT (Illumina sequencing<br>primer sequence)-YYYYYYY (barcode)-<br>GTACACAGCAGGTTCTGGGTTCTGG |
| Primer 2                 | Illumina-IndexZ    | CAAGCAGAAGACGGCATAACGAGAT (Illumina adapter)-<br>ZZZZZZ (barcode)- GTGACTGGAGTTCAGACGTGTGCTCTTCCGATCT<br>(Illumina sequencing primer sequence)                             |

### Beta chain PCR products sequenced on 454 GSJR

| 1 <sup>st</sup> step PCR | Primer Name            | Primer Sequence                                                                        |
|--------------------------|------------------------|----------------------------------------------------------------------------------------|
| Primer 1                 | MBC3                   | AGCCCATGGAAGTGCCTTGGCAGCG                                                              |
| Primer 2                 | Universal Primer A Mix | Provided from SMARTer RACE cDNA amplification kit (Takara)                             |
|                          |                        |                                                                                        |
| 2 <sup>nd</sup> step PCR | Primer Name            | Primer Sequence                                                                        |
| Primer 1                 | LibL_MIDsX_MBC3        | CCATCTCATCCCTGCGTGTCTCCGACTCAG (454 adapter)-<br>XXXXX (barcode)- CCTGGCCAAGCACACGAGGG |
| Primer 2                 | TitB-RACE              | CCTATCCCCTGTGTGCCTTGGCAGTCTCAG (454 adapter)-<br>AAGCAGTGGTATCAACGCAGAGT               |

### Beta chain PCR products sequenced on Illumina MiSEQ

| <b>1<sup>st</sup> step PCR</b> | <b>Primer Name</b> | <b>Primer Sequence</b>                                                                                                                                                     |
|--------------------------------|--------------------|----------------------------------------------------------------------------------------------------------------------------------------------------------------------------|
| <b>Primer 1</b>                | MBC3               | AGCCCATGGAACTGCACTTGGCAGCG                                                                                                                                                 |
| <b>Primer 2</b>                | Illumina-UMI       | CAGACGTGTGCTCTTCCGATCT-NNNNNNNN (random 6-8mers)-<br>AAGCAGTGGTATCAACGCAGAGT                                                                                               |
| <b>Primer 3</b>                | Illumina-short     | CAGACGTGTGCTCTTCCGATCT                                                                                                                                                     |
|                                |                    |                                                                                                                                                                            |
| <b>2<sup>nd</sup> step PCR</b> | <b>Primer Name</b> | <b>Primer Sequence</b>                                                                                                                                                     |
| <b>Primer 1</b>                | Illumina-MBC-MIDsY | AATGATACGGCGACCACCGAGATCT (Illumina adapter)-<br>ACACTCTTCCCTACACGACGCTCTTCCGATCT (Illumina sequencing<br>primer sequence)-YYYYYYY (barcode)-<br>ACAAGGAGACCTTGGGTGGAGTCAC |
| <b>Primer 2</b>                | Illumina-IndexZ    | CAAGCAGAAGACGGCATAACGAGAT (Illumina adapter)-<br>ZZZZZ (barcode)- GTGACTGGAGTTCAGACGTGTGCTCTTCCGATCT<br>(Illumina sequencing primer sequence)                              |

# Supplemental Table 2

Supplemental Table 2: Primers to generate TRAV16-TCR amplicons

| 1 <sup>st</sup> step PCR | Primer Name        | Primer Sequence                                                                                                                                                               |                                                                                                                                                                            |
|--------------------------|--------------------|-------------------------------------------------------------------------------------------------------------------------------------------------------------------------------|----------------------------------------------------------------------------------------------------------------------------------------------------------------------------|
| Primer 1                 | TRAV16-F2          | ACGGTGACAATGGACTGTGTGTATG                                                                                                                                                     |                                                                                                                                                                            |
| Primer 2                 | MAC short          | GTGCTGTCCTGAGACCGAGGATC                                                                                                                                                       |                                                                                                                                                                            |
|                          |                    |                                                                                                                                                                               |                                                                                                                                                                            |
| 2 <sup>nd</sup> step PCR | Primer Name        | Primer Sequence                                                                                                                                                               |                                                                                                                                                                            |
| Primer 1                 | TRAV16-Illumina-1  | CAAGCAGAAGACGGCATAACGAGAT (Illumina adapter)-<br>CGTGAT (barcode)- GTGACTGGAGTTCAGACGTGTGCTCTTCCGATCT<br>(Illumina sequencing primer sequence)-<br>TGGTACAAGCAAACAGCAAGTGG    |                                                                                                                                                                            |
|                          | TRAV16-Illumina-3  | CAAGCAGAAGACGGCATAACGAGAT (Illumina adapter)-<br>GCCTAA (barcode)- GTGACTGGAGTTCAGACGTGTGCTCTTCCGATCT<br>(Illumina sequencing primer sequence)-<br>ACTGGTACAAGCAAACAGCAAGTGG  |                                                                                                                                                                            |
|                          | TRAV16-Illumina-4  | CAAGCAGAAGACGGCATAACGAGAT (Illumina adapter)-<br>TGGTCA (barcode)- GTGACTGGAGTTCAGACGTGTGCTCTTCCGATCT<br>(Illumina sequencing primer sequence)-<br>AACTGGTACAAGCAAACAGCAAGTGG |                                                                                                                                                                            |
|                          | TRAV16-Illumina-6  | CAAGCAGAAGACGGCATAACGAGAT (Illumina adapter)-<br>ATTGGC (barcode)- GTGACTGGAGTTCAGACGTGTGCTCTTCCGATCT<br>(Illumina sequencing primer sequence)-<br>AACTGGTACAAGCAAACAGCAAGTGG |                                                                                                                                                                            |
|                          | TRAV16-Illumina-7  | CAAGCAGAAGACGGCATAACGAGAT (Illumina adapter)-<br>GATCTG (barcode)- GTGACTGGAGTTCAGACGTGTGCTCTTCCGATCT<br>(Illumina sequencing primer sequence)-<br>CTGGTACAAGCAAACAGCAAGTGG   |                                                                                                                                                                            |
|                          | TRAV16-Illumina-8  | CAAGCAGAAGACGGCATAACGAGAT (Illumina adapter)-<br>TCAAGT (barcode)- GTGACTGGAGTTCAGACGTGTGCTCTTCCGATCT<br>(Illumina sequencing primer sequence)-<br>CTGGTACAAGCAAACAGCAAGTGG   |                                                                                                                                                                            |
|                          | TRAV16-Illumina-9  | CAAGCAGAAGACGGCATAACGAGAT (Illumina adapter)-<br>CTGATC (barcode)- GTGACTGGAGTTCAGACGTGTGCTCTTCCGATCT<br>(Illumina sequencing primer sequence)-<br>CTGGTACAAGCAAACAGCAAGTGG   |                                                                                                                                                                            |
|                          | TRAV16-Illumina-10 | CAAGCAGAAGACGGCATAACGAGAT (Illumina adapter)-<br>AAGCTA (barcode)- GTGACTGGAGTTCAGACGTGTGCTCTTCCGATCT<br>(Illumina sequencing primer sequence)-<br>CTGGTACAAGCAAACAGCAAGTGG   |                                                                                                                                                                            |
|                          | Primer 2           | Illumina-MAC-MIDSY                                                                                                                                                            | AATGATACGGCGACCACCGAGATCT (Illumina adapter)-<br>ACACTCTTCCCTACACGACGCTCTTCCGATCT (Illumina sequencing<br>primer sequence)-YYYYYYY (barcode)-<br>GTACACAGCAGGTTCTGGGTTCTGG |

# Supplemental Table 3

**Supplemental Table 3: TCR sequencing of NOD mouse islets**

| Cohort* | Mouse ID  | Age at sampling (weeks) | Litter information | Nb of islets processed | Total alpha in-frame reads | Unique alpha in-frame clonotypes | Total beta in-frame reads | Unique beta in-frame clonotypes |
|---------|-----------|-------------------------|--------------------|------------------------|----------------------------|----------------------------------|---------------------------|---------------------------------|
| 1       | NOD15     | 8.5                     | A                  | 115                    | 38,137                     | 4,232                            | 15,142                    | 2,424                           |
| 1       | NOD16     | 7.2                     | B                  | 45                     | 57,583                     | 7,297                            | 29,150                    | 4,528                           |
| 1       | NOD17     | 7.2                     | B                  | 100                    | 19,539                     | 3,763                            | 30,039                    | 2,528                           |
| 1       | NOD24     | 8.1                     | C                  | 130                    | 41,988                     | 1,849                            | 52,980                    | 1,295                           |
| 1       | NOD25     | 8.1                     | C                  | 120                    | 45,449                     | 2,243                            | 38,851                    | 1,468                           |
| 1       | NOD28     | 9.3                     | D                  | 125                    | 50,747                     | 2,759                            | 36,937                    | 2,514                           |
| 1       | NOD29     | 9.3                     | D                  | 125                    | 51,691                     | 2,348                            | 35,254                    | 2,359                           |
| 2       | NOD2025-1 | 9.7                     | 2025-A             | 185                    | 4,445,366                  | 13,113                           | Not done                  |                                 |
| 2       | NOD2025-2 | 9.3                     | 2025-B             | 185                    | 4,717,345                  | 15,607                           |                           |                                 |
| 2       | NOD2025-3 | 10.4                    | 2025-C             | 135                    | 3,045,407                  | 13,375                           |                           |                                 |
| 2       | NOD2025-4 | 10.4                    | 2025-C             | 190                    | 4,338,267                  | 15,582                           |                           |                                 |
| 3       | NOD2025-5 | 16.1                    | 2025-B             | 70                     | 3,517,206                  | 11,005                           |                           |                                 |
| 3       | NOD2025-6 | 10.1                    | 2025-D             | 175                    | 3,596,129                  | 9,856                            |                           |                                 |
| 3       | NOD2025-7 | 9.0                     | 2025-E             | 110                    | 4,108,620                  | 7,082                            |                           |                                 |
| 3       | NOD2025-8 | 9.0                     | 2025-E             | 200                    | 2,403,250                  | 4,833                            |                           |                                 |

\* Cohort 1: animals analyzed for the results shown in Figure 1 and Tables 1 and 2.

Cohort 2 and 3: animals analyzed for the results shown in Tables 1 and 2.

# Supplemental Table 4

Supplemental Table 4: Beta clonotypes tested for the paring with public NY8.3 alpha

| Beta ID   | TRBV     | TRBJ    | AA JUNCTION      | % in NOD24 | Rank in NOD24 | % in NOD25 | Rank in NOD25 | Number of mice sharing |
|-----------|----------|---------|------------------|------------|---------------|------------|---------------|------------------------|
| NOD24-B1  | TRBV3    | TRBJ2-1 | CASSPGTGGEDAEQFF | 15.72%     | 1             | ND         |               | 1                      |
| NOD24-B2  | TRBV13-1 | TRBJ2-1 | CASSDRGVAEQFF    | 4.21%      | 2             | ND         |               | 1                      |
| NOD24-B3  | TRBV15   | TRBJ2-7 | CASSRDSSYEQYF    | 4.11%      | 3             | ND         |               | 3                      |
| NOD24-B4  | TRBV15   | TRBJ2-7 | CASSFSGDEQYF     | 3.19%      | 4             | ND         |               | 1                      |
| NOD24-B5  | TRBV15   | TRBJ2-7 | CASSLAQYEQYF     | 2.85%      | 5             | ND         |               | 1                      |
| NOD24-B6  | TRBV13-3 | TRBJ1-4 | CASSDAGVNERLFF   | 2.77%      | 3             | ND         |               | 1                      |
| NOD24-B7  | TRBV4    | TRBJ2-7 | CASSWGYEQYF      | 1.94%      | 8             | ND         |               | 1                      |
| NOD24-B8  | TRBV1    | TRBJ1-6 | CTCSPPGQGNSPLYF  | 2.04%      | 7             | ND         |               | 1                      |
| NOD24-B9  | TRBV13-2 | TRBJ2-5 | CASGGDWGGQDTQYF  | 1.37%      | 9             | ND         |               | 1                      |
| NOD24-B10 | TRBV20   | TRBJ1-2 | CGARATGGSSDYTF   | 1.25%      | 11            | ND         |               | 1                      |
| NOD24-B11 | TRBV16   | TRBJ1-1 | CASSLDRNTEVFF    | 1.28%      | 10            | ND         |               | 1                      |
| NOD24-B12 | TRBV13-2 | TRBJ2-7 | CASGGYEQYF       | 1.07%      | 14            | 0.01%      | 667           | 3                      |
| NOD25-B13 | TRBV13-1 | TRBJ2-5 | CASSDGTGEDTQYF   | ND         |               | 11.67%     | 1             | 2                      |
| NOD25-B14 | TRBV1    | TRBJ2-2 | CTCSPPGQNTGQLYF  | ND         |               | 6.34%      | 2             | 1                      |
| NOD25-B15 | TRBV13-1 | TRBJ2-7 | CASSYRGGEQYF     | ND         |               | 5.09%      | 3             | 1                      |
| NOD25-B16 | TRBV13-3 | TRBJ2-4 | CASSDSQNTLYF     | 0.22%      | 86            | 3.95%      | 4             | 5                      |
| NOD25-B17 | TRBV1    | TRBJ2-4 | CTCSAELGGQNTLYF  | ND         |               | 3.75%      | 5             | 1                      |
| NOD25-B18 | TRBV13-3 | TRBJ2-4 | CASSADWENTLYF    | ND         |               | 3.65%      | 6             | 1                      |
| NOD25-B19 | TRBV20   | TRBJ2-1 | CGARVGGRYAEQFF   | ND         |               | 3.56%      | 7             | 1                      |
| NOD25-B20 | TRBV13-3 | TRBJ2-4 | CASSDAQNTLYF     | ND         |               | 1.58%      | 11            | 1                      |
| NOD25-B22 | TRBV15   | TRBJ1-2 | CASSLGQGDSDYTF   | ND         |               | 1.50%      | 12            | 1                      |
| NOD25-B23 | TRBV1    | TRBJ1-6 | CTCSAGQGNSPLYF   | ND         |               | 1.90%      | 8             | 1                      |
| NOD25-B24 | TRBV5    | TRBJ2-4 | CASSQDFQSQNTLYF  | ND         |               | 1.47%      | 13            | 1                      |
| NOD25-B25 | TRBV31   | TRBJ1-1 | CAWSQRTGVGTEVFF  | ND         |               | 1.62%      | 10            | 1                      |
| NOD25-B26 | TRBV13-1 | TRBJ1-4 | CASSVDGDERLFF    | ND         |               | 1.18%      | 14            | 1                      |

ND: Not detected

# Supplemental Table 5

**Supplemental Table 5: TCR sequencing of NOD mouse islets and peripheral immune organs**

| Islets                 | Total alpha in-frame reads | Unique alpha in-frame clonotypes | Total beta in-frame reads | Unique beta in-frame clonotypes |
|------------------------|----------------------------|----------------------------------|---------------------------|---------------------------------|
| NOD26                  | 985,010                    | 16,557                           | 657,623                   | 11,764                          |
| NOD28                  | 1,057,459                  | 24,533                           | 1,119,029                 | 28,282                          |
| NOD29                  | 1,138,110                  | 22,649                           | 951,905                   | 22,221                          |
|                        |                            |                                  |                           |                                 |
| Pancreatic lymph nodes | Total alpha in-frame reads | Unique alpha in-frame clonotypes | Total beta in-frame reads | Unique beta in-frame clonotypes |
| NOD26                  | 2,769,784                  | 188,098                          | 3,398,515                 | 250,607                         |
| NOD28                  | 2,275,840                  | 294,930                          | 4,323,129                 | 722,413                         |
| NOD29                  | 3,222,389                  | 254,462                          | 3,363,743                 | 326,212                         |
|                        |                            |                                  |                           |                                 |
| Blood                  | Total alpha in-frame reads | Unique alpha in-frame clonotypes | Total beta in-frame reads | Unique beta in-frame clonotypes |
| NOD26                  | 2,099,445                  | 107,545                          | 3,260,187                 | 203,538                         |
| NOD28                  | 1,540,902                  | 62,400                           | 2,821,750                 | 161,740                         |
| NOD29                  | 1,744,235                  | 97,847                           | 3,442,126                 | 241,490                         |

# Supplemental Table 6

**Supplemental Table 6: Statistical analysis evaluating the correlation of TCR frequencies between the islets and PLN or blood**

| Rank (Alpha) | Estimated difference (PLN-Alpha – Blood-Alpha) ± standard error | P-Value |
|--------------|-----------------------------------------------------------------|---------|
| 10           | 83.333 ± 5.282                                                  | <0.001  |
| 100          | 46.667 ± 5.282                                                  | 0.001   |
| 1000         | 37.067 ± 5.282                                                  | 0.002   |
| all          | 6.757 ± 5.282                                                   | 0.270   |
|              |                                                                 |         |
| Rank (Beta)  | Estimated difference (PLN-Beta – Blood-Beta) ± standard error   | P-Value |
| 10           | 70.000 ± 5.623                                                  | <0.001  |
| 100          | 58.000 ± 5.623                                                  | <0.001  |
| 1000         | 38.267 ± 5.623                                                  | 0.002   |
| all          | 8.267 ± 5.623                                                   | 0.215   |

# Supplemental Table 7

**Supplemental Table 7: Mice used for the Longitudinal analysis of NY8.3 clonotype frequencies in the blood**

| Cohort* | Strain     | Mouse ID | Age of diabetes (weeks) | Litter information | Sampling 1 weeks of age (Total in-frame reads) | Sampling 2 weeks of age (Total in-frame reads) | Sampling 3 weeks of age (Total in-frame reads) | Sampling 4 weeks of age (Total in-frame reads) |
|---------|------------|----------|-------------------------|--------------------|------------------------------------------------|------------------------------------------------|------------------------------------------------|------------------------------------------------|
| 1       | WT NOD     | NOD104   | 18                      | A                  | 4 (1,069,916)                                  | 10 (1,223,792)                                 | 15 (1,613,552)                                 | 18 (2,092,326)                                 |
| 1       | WT NOD     | NOD105   | 18                      | A                  | 4 (1,711,121)                                  | 10 (2,175,181)                                 | 15 (2,615,307)                                 | 18 (1,991,711)                                 |
| 1       | WT NOD     | NOD106   | No**                    | A                  | 4 (1,558,062)                                  | 10 (1,333,804)                                 | 15 (2,135,266)                                 | 21 (1,649,784)                                 |
| 1       | WT NOD     | NOD107   | 17                      | B                  | 5 (1,648,218)                                  | 10 (1,442,495)                                 | 15 (1,927,723)                                 | 17 (1,880,318)                                 |
| 1       | WT NOD     | NOD108   | 17                      | B                  | 5 (2,123,119)                                  | 10 (2,930,264)                                 | 15 (1,535,585)                                 | 17 (2,362,644)                                 |
| 1       | WT NOD     | NOD110   | 12                      | B                  | 5 (1,249,134)                                  | 10 (1,378,383)                                 | 12 (1,896,159)                                 | NS***                                          |
| 1       | WT NOD     | NOD111   | 18                      | C                  | 7 (1,078,530)                                  | 11 (1,292,589)                                 | 15 (1,378,802)                                 | 18 (2,138,628)                                 |
| 1       | WT NOD     | NOD112   | 16                      | D                  | 5 (1,587,113)                                  | 11 (1,552,225)                                 | 15 (2,215,495)                                 | 16 (2,558,196)                                 |
| 1       | WT NOD     | NOD115   | No**                    | D                  | 5 (1,338,895)                                  | 11 (1,909,489)                                 | 15 (2,606,266)                                 | 22 (1,366,869)                                 |
| 1       | Insulin-KO | FKO101   | No**                    | E                  | 5 (1,973,357)                                  | 10 (1,122,121)                                 | 15 (1,226,931)                                 | 20 (1,813,873)                                 |
| 1       | Insulin-KO | FKO103   | No**                    | F                  | 5 (1,610,991)                                  | 10 (581,322)                                   | 14 (855,928)                                   | 20 (909,855)                                   |
| 1       | Insulin-KO | FKO104   | No**                    | F                  | 5 (1,281,060)                                  | 10 (1,789,709)                                 | 14 (1,030,923)                                 | 20 (1,484,822)                                 |
| 1       | Insulin-KO | FKO106   | No**                    | G                  | 5 (1,249,998)                                  | 11 (2,226,010)                                 | 15 (1,193,615)                                 | 20 (2,460,945)                                 |
| 1       | Insulin-KO | FKO107   | No**                    | G                  | 5 (1,563,752)                                  | 11 (2,174,681)                                 | 15 (2,151,118)                                 | 20 (2,314,362)                                 |
| 1       | Insulin-KO | FKO108   | No**                    | G                  | 5 (1,122,873)                                  | 11 (1,213,187)                                 | 15 (886,480)                                   | 20 (1,375,617)                                 |
| 1       | Insulin-KO | FKO109   | No**                    | H                  | 5 (1,336,809)                                  | 11 (1,468,089)                                 | 15 (1,327,351)                                 | 20 (1,616,527)                                 |
| 2       | WT NOD     | C3       | No**                    | I                  | 5 (4,193,573)                                  | 9 (4,055,747)                                  | 14 (4,656,857)                                 | 19 (5,141,010)                                 |
| 2       | WT NOD     | C5       | 17                      | J                  | 5 (10,576,883)                                 | 9 (13,777,653)                                 | 14 (13,296,573)                                | 17 (15,480,063)                                |
| 2       | WT NOD     | C6       | 16                      | J                  | 5 (4,317,153)                                  | 9 (3,163,090)                                  | 14 (4,569,335)                                 | 16 (3,768,299)                                 |
| 2       | WT NOD     | C7       | 17                      | K                  | 4 (12,436,138)                                 | 9 (13,251,127)                                 | 14 (17,796,141)                                | 17 (12,149,154)                                |
| 2       | WT NOD     | C8       | No**                    | K                  | 4 (5,303,064)                                  | 9 (4,717,092)                                  | 14 (3,600,914)                                 | 19 (4,929,517)                                 |
| 2       | WT NOD     | C11      | No**                    | L                  | 4 (2,314,130)                                  | 9 (3,387,880)                                  | 14 (3,226,386)                                 | 19 (2,993,437)                                 |
| 2       | WT NOD     | C12      | 17                      | L                  | 4 (8,236,554)                                  | 9 (8,745,496)                                  | 14 (9,542,150)                                 | 17 (10,060,768)                                |
| 2       | WT NOD     | C13      | 19                      | L                  | 4 (7,710,946)                                  | 9 (5,404,204)                                  | 14 (4,744,058)                                 | 19 (7,547,577)                                 |
| 2       | WT NOD     | C14      | No**                    | L                  | 4 (9,340,808)                                  | 9 (4,937,777)                                  | 14 (4,851,409)                                 | 19 (4,719,803)                                 |
| 2       | WT NOD     | C15      | 13                      | M                  | 5 (7,418,086)                                  | 10 (5,112,072)                                 | 13 (6,795,967)                                 | NS***                                          |
| 2       | WT NOD     | C17      | 15                      | N                  | 5 (7,042,369)                                  | 10 (4,591,012)                                 | 15 (5,595,926)                                 | NS***                                          |
| 2       | WT NOD     | C18      | 16                      | N                  | 5 (10,063,480)                                 | 10 (12,022,105)                                | 15 (16,198,920)                                | 16 (13,139,413)                                |
| 2       | Insulin-KO | KO1      | No**                    | O                  | 5 (8,923,585)                                  | 10 (7,273,109)                                 | 15 (6,216,387)                                 | 19 (8,129,167)                                 |
| 2       | Insulin-KO | KO2      | No**                    | O                  | 5 (8,780,928)                                  | 10 (6,184,497)                                 | 15 (5,250,893)                                 | 19 (7,484,916)                                 |
| 2       | Insulin-KO | KO3      | No**                    | O                  | 5 (8,052,439)                                  | 10 (6,391,635)                                 | 15 (7,100,899)                                 | 19 (7,383,013)                                 |
| 2       | Insulin-KO | KO4      | No**                    | O                  | 5 (6,153,258)                                  | 10 (7,382,593)                                 | 15 (8,080,229)                                 | 19 (7,540,552)                                 |
| 2       | Insulin-KO | KO5      | No**                    | P                  | 5 (3,511,083)                                  | 11 (4,149,135)                                 | 15 (4,690,297)                                 | 20 (3,174,493)                                 |
| 2       | Insulin-KO | KO6      | No**                    | Q                  | 5 (4,690,744)                                  | 10 (5,489,943)                                 | 14 (3,609,444)                                 | 19 (3,146,172)                                 |
| 2       | Insulin-KO | KO7      | No**                    | Q                  | 5 (5,309,687)                                  | 10 (3,980,164)                                 | 14 (4,612,929)                                 | 19 (3,234,381)                                 |
| 2       | Insulin-KO | KO8      | No**                    | Q                  | 5 (4,727,883)                                  | 10 (2,824,690)                                 | 14 (3,563,029)                                 | 19 (4,137,345)                                 |

\* Cohort 1: animals analyzed for the results shown in Figure 4 and Supplemental Figure 5.

Cohort 2: animals analyzed for the results shown in Supplemental Figure 6.

\*\* non-diabetic

\*\*\* Not sampled; sacrificed at diabetes onset

# Supplemental Table 8

**Supplemental Table 8: Demographics of organ donors for islets and pancreas slice sampling**

|                                                        | T1D        | AAb+       | Non-diabetic |
|--------------------------------------------------------|------------|------------|--------------|
| Number                                                 | 14         | 4          | 9            |
| Age (years): Mean (SD)                                 | 18.1 (9.0) | 22.3 (4.6) | 26.2 (6.3)   |
| Age (years): Range                                     | 3-28       | 19-29      | 18-34        |
| Gender: Female %                                       | 64%        | 50%        | 33%          |
| HLA: DR4-DQ8 % present                                 | 50%        | 25%        | 11%          |
| HLA: DR3-DQ2 % present                                 | 50%        | 50%        | 44%          |
| HLA: A2 % present                                      | 57%        | 75%        | 56%          |
| Number of CD4 T cells analyzed                         | 2,580      | 355        | 474          |
| Number of in-frame TCRs detected (CD4-alpha)           | 2,191      | 390        | 427          |
| Number of in-frame TCRs detected (CD4-beta)            | 2,279      | 344        | 405          |
| Number of unique TCR clonotypes identified (CD4-alpha) | 1,843      | 323        | 343          |
| Number of unique TCR clonotypes identified (CD4-beta)  | 1,923      | 281        | 326          |
| Number of CD8 T cells analyzed                         | 2,788      | 849        | 1,272        |
| Number of in-frame TCRs detected (CD8-alpha)           | 2,543      | 933        | 1,053        |
| Number of in-frame TCRs detected (CD8-beta)            | 2,420      | 827        | 1,073        |
| Number of unique TCR clonotypes identified (CD8-alpha) | 1,596      | 495        | 616          |
| Number of unique TCR clonotypes identified (CD8-beta)  | 1,564      | 463        | 617          |

SD: standard deviation

DR4-DQ8: DRB1\*04:0X-DQA1\*03:01-DQB1:03:02

DR3-DQ2: DRB1\*03:01-DQA1\*05:01-DQB1:02:01

A2: A\*02:01

# Supplemental Table 9

Supplemental Table 8: TCR sequencing information of human islets and pancreas slice samples

| Donor Type   | DR4-DQ8 | DR3-DQ2 | A2  | Number of in-frame TCRs detected |          |           |          |
|--------------|---------|---------|-----|----------------------------------|----------|-----------|----------|
|              |         |         |     | CD4_alpha                        | CD4_beta | CD8_alpha | CD8_beta |
| T1D          | Yes     | No      | Yes | 10                               | 7        | 43        | 42       |
| T1D          | Yes     | Yes     | No  | 252                              | 282      | 120       | 145      |
| T1D          | Yes     | No      | Yes | 351                              | 428      | 173       | 182      |
| T1D          | Yes     | No      | Yes | 166                              | 157      | 170       | 183      |
| T1D          | No      | Yes     | No  | 224                              | 210      | 106       | 121      |
| T1D          | No      | No      | No  | 25                               | 35       | 138       | 193      |
| T1D          | Yes     | Yes     | Yes | 76                               | 101      | 201       | 217      |
| T1D          | No      | No      | No  | 74                               | 142      | 48        | 76       |
| T1D          | No      | Yes     | No  | 65                               | 59       | 192       | 178      |
| T1D          | Yes     | Yes     | Yes | 154                              | 145      | 443       | 343      |
| T1D          | Yes     | Yes     | Yes | 243                              | 213      | 229       | 180      |
| T1D          | No      | Yes     | No  | 263                              | 251      | 190       | 198      |
| T1D          | No      | No      | Yes | 97                               | 83       | 314       | 229      |
| T1D          | No      | No      | Yes | 191                              | 166      | 176       | 133      |
| AAb+         | No      | No      | Yes | 269                              | 241      | 385       | 358      |
| AAb+         | No      | Yes     | Yes | 66                               | 56       | 350       | 290      |
| AAb+         | No      | Yes     | Yes | 20                               | 13       | 53        | 50       |
| AAb+         | Yes     | No      | No  | 35                               | 34       | 145       | 129      |
| Non-diabetic | No      | Yes     | Yes | 52                               | 49       | 152       | 155      |
| Non-diabetic | No      | Yes     | No  | 56                               | 40       | 143       | 152      |
| Non-diabetic | No      | No      | Yes | 13                               | 17       | 52        | 54       |
| Non-diabetic | No      | No      | Yes | 13                               | 24       | 163       | 172      |
| Non-diabetic | No      | No      | Yes | 0                                | 0        | 71        | 74       |
| Non-diabetic | No      | No      | No  | 0                                | 0        | 62        | 55       |
| Non-diabetic | No      | Yes     | No  | 19                               | 14       | 199       | 204      |
| Non-diabetic | No      | Yes     | No  | 174                              | 159      | 103       | 98       |
| Non-diabetic | Yes     | No      | Yes | 100                              | 102      | 108       | 109      |

DR4-DQ8: DRB1\*04:0X-DQA1\*03:01-DQB1:03:02

DR3-DQ2: DRB1\*03:01-DQA1\*05:01-DQB1:02:01

A2: A\*02:01

# Supplemental Table 10

Supplemental Table 10: Unique TCR clonotypes detected in the pancreas of two or more donors

| T cell subset | Chain Type   | V-gene            | J-gene        | Junction              | Donors (number) |          |              | HLA alleles shared among donors                            | Known specificity to preproinsulin |
|---------------|--------------|-------------------|---------------|-----------------------|-----------------|----------|--------------|------------------------------------------------------------|------------------------------------|
|               |              |                   |               |                       | T1D             | AAb+     | Non-diabetic |                                                            |                                    |
| CD4           | Alpha        | TRAV8-1           | TRAJ26        | CAVNGDNYGQNFVF        | 2               | 0        | 0            | DRB1*04:0X, DQA1*03:01, DQB1*03:02, DPA1*01:03, DPB1*04:01 |                                    |
| CD4           | Alpha        | TRAV36/DV7        | TRAJ44        | CAVETGTASKLTF         | 2               | 0        | 0            | DRB1*04:0X, DQA1*03:01, DQB1*03:02, DPA1*01:03             |                                    |
| CD4           | Alpha        | TRAV4             | TRAJ8         | CLVGDMNTGFQKLVF       | 2               | 0        | 0            | DRB1*03:01, DQA1*05:01, DQB1*02:01, DPA1*01:03             |                                    |
| CD4           | Alpha        | TRAV13-1          | TRAJ17        | CAASIKAAGNKLTF        | 2               | 0        | 0            | DPA1*01:03, DPB1*04:01                                     |                                    |
| CD4           | Alpha        | TRAV14/DV4        | TRAJ54        | CAMREGVQGAQKLVF       | 2               | 0        | 0            | DPA1*01:03                                                 |                                    |
| CD4           | Alpha        | TRAV8-2/8-4       | TRAJ17        | CAVSKAAGNKLTF         | 1               | 1        | 0            | DPA1*01:03, DPB1*04:01                                     |                                    |
| CD4           | Alpha        | TRAV13-1          | TRAJ40        | CAASRTTSGTYKYIF       | 1               | 0        | 1            | DRB1*04:04, DQA1*03:01, DQB1*03:02, DPA1*01:03, DPA1*02:01 |                                    |
| CD4           | Alpha        | TRAV13-1          | TRAJ53        | CAASGGSNYKLTF         | 1               | 0        | 1            | DPA1*01:03, DPB1*04:01                                     |                                    |
| CD4           | Alpha        | TRAV16            | TRAJ27        | CALNTNAGKSTF          | 1               | 0        | 1            | DPA1*01:03, DPB1*04:01                                     |                                    |
| CD4           | Alpha        | TRAV29/DV5        | TRAJ42        | CAATFYGGSQGNLIF       | 0               | 0        | 2            | DQA1*03:03, DQB1*03:02, DPA1*01:03                         |                                    |
| CD4           | Beta         | TRBV20-1          | TRBJ1-3       | CSARGPNSGNTIYF        | 2               | 0        | 0            | DPA1*01:03, DPB1*04:01                                     |                                    |
| CD4           | Beta         | TRBV27            | TRBJ2-3       | CASSLWTSSDTQYF        | 1               | 0        | 1            | DRB1*04:04, DQA1*03:01, DQB1*03:02, DPA1*01:03, DPA1*02:01 |                                    |
| CD8           | Alpha        | TRAV19            | TRAJ49        | CALSEAHTGNQFYF        | 2               | 0        | 0            | A*02:01, B*40:01, C*03:04                                  |                                    |
| <b>CD8</b>    | <b>Alpha</b> | <b>TRAV3</b>      | <b>TRAJ26</b> | <b>CAVPDNYGQNFVF</b>  | <b>2</b>        | <b>0</b> | <b>0</b>     | <b>A*01:01, B*08:01, C*07:01</b>                           | <b>PPI:96-103</b>                  |
| CD8           | Alpha        | TRAV3             | TRAJ37        | CAVPSNTGKLIF          | 2               | 0        | 0            | A*01:01, B*08:01, C*07:01                                  |                                    |
| <b>CD8</b>    | <b>Alpha</b> | <b>TRAV19</b>     | <b>TRAJ9</b>  | <b>CALTLNTGGFKTIF</b> | <b>2</b>        | <b>0</b> | <b>0</b>     | <b>B*08:01, C*07:01</b>                                    | <b>PPI:33-41</b>                   |
| CD8           | Alpha        | TRAV8-1           | TRAJ39        | CAVNNNAGNMLTF         | 2               | 0        | 0            | B*08:01, C*07:01                                           |                                    |
| <b>CD8</b>    | <b>Alpha</b> | <b>TRAV8-1</b>    | <b>TRAJ13</b> | <b>CAVNAAGGYQKVTF</b> | <b>2</b>        | <b>0</b> | <b>0</b>     | <b>None</b>                                                | <b>PPI:1-11</b>                    |
| CD8           | Alpha        | TRAV19            | TRAJ42        | CALSEAGNYGGSQGNLIF    | 2               | 1        | 0            | A*02:01                                                    |                                    |
| CD8           | Alpha        | TRAV21            | TRAJ11        | CAVNSGYSTLTF          | 1               | 1        | 0            | A*01:01, B*08:01, B*07:02, C*07:01, C*07:02                |                                    |
| <b>CD8</b>    | <b>Alpha</b> | <b>TRAV29/DV5</b> | <b>TRAJ57</b> | <b>CAASAGGGSEKLVF</b> | <b>1</b>        | <b>1</b> | <b>0</b>     | <b>A*01:01, A*02:01, B*08:01, C*07:01</b>                  | <b>PPI:2-11</b>                    |
| CD8           | Alpha        | TRAV13-1          | TRAJ45        | CAASISGGGADGLTF       | 1               | 1        | 0            | A*02:01, C*07:01                                           |                                    |
| CD8           | Alpha        | TRAV19            | TRAJ35        | CALSGFGNVLHC          | 1               | 1        | 0            | A*02:01                                                    |                                    |
| CD8           | Alpha        | TRAV12-2          | TRAJ7         | CAVRYGNNRLAF          | 1               | 1        | 1            | A*01:01, B*08:01, C*05:01, C*07:01                         |                                    |
| CD8           | Alpha        | TRAV26-2          | TRAJ39        | CILSKNAGNMLTF         | 1               | 0        | 1            | A*02:01, B*40:01, C*03:04, C*07:0X                         |                                    |
| CD8           | Alpha        | TRAV27            | TRAJ42        | CAGAGGGSQGNLIF        | 1               | 0        | 1            | A*02:01, C*07:0X                                           |                                    |
| CD8           | Alpha        | TRAV12-2          | TRAJ15        | CAVNQAGTALIF          | 1               | 0        | 1            | None                                                       |                                    |
| CD8           | Alpha        | TRAV13-1          | TRAJ26        | CAANNYQNFVF           | 0               | 1        | 1            | A*02:01, A*30:02, C*07:0X                                  |                                    |
| CD8           | Alpha        | TRAV1-2           | TRAJ4         | CAGSGGYNKLIF          | 0               | 0        | 2            | A*30:02, B*18:01, C*05:01, C*07:0X                         |                                    |
| CD8           | Beta         | TRBV13            | TRBJ2-3       | CASSFGTDTQYF          | 2               | 0        | 0            | C*03:04, C*07:0X                                           |                                    |
| CD8           | Beta         | TRBV19            | TRBJ2-7       | CASSIRSSYEYF          | 2               | 0        | 1            | A*02:01, C*07:01                                           |                                    |
| CD8           | Beta         | TRBV19            | TRBJ2-3       | CASSIRSTDTQYF         | 1               | 1        | 0            | A*02:01, C*07:01                                           |                                    |
| CD8           | Beta         | TRBV7-8           | TRBJ1-5       | CASSLERGGGQPQHF       | 1               | 1        | 0            | A*02:01, C*06:02                                           |                                    |

|     |      |          |         |                |   |   |   |                                       |  |
|-----|------|----------|---------|----------------|---|---|---|---------------------------------------|--|
| CD8 | Beta | TRBV9    | TRBJ2-7 | CASSVGQGTYEQYF | 0 | 2 | 0 | A*02:01                               |  |
| CD8 | Beta | TRBV7-9  | TRBJ1-5 | CASSLGQGDQPQHF | 1 | 0 | 1 | A*02:01                               |  |
| CD8 | Beta | TRBV20-1 | TRBJ2-7 | CSASSGYEQYF    | 0 | 0 | 2 | A*30:02, B*18:01, C*05:01,<br>C*07:0X |  |
| CD8 | Beta | TRBV27   | TRBJ2-7 | CASRGVSYEQYF   | 0 | 0 | 2 | A*30:02, C*07:0X                      |  |

X: any allele number shared within a designated allele group

# Supplemental Table 11

Supplemental Table 11: Bootstrapping analysis controlling for differences in cell number comparing shared clonotype frequencies between CD4 and CD8-derived TCR clonotypes

|                | CD4 Alpha count | CD8 Alpha Mean count | CD8 Alpha SD | Alpha p value* |
|----------------|-----------------|----------------------|--------------|----------------|
| T1D            | 5               | 5.393                | 1.08983427   | 0.718          |
| AAb+           | 0               | 0                    | 0            | not applicable |
| Non-diabetic   | 1               | 0.34                 | 0.4739458    | 0.164          |
| Between groups | 4               | 4.617                | 1.44651423   | 0.67           |
|                |                 |                      |              |                |
|                | CD4 Beta count  | CD8 Beta Mean count  | CD8 Beta SD  | Beta p value*  |
| T1D            | 1               | 1.758                | 0.45567932   | 0.096          |
| AAb+           | 0               | 0.425                | 0.49459036   | 0.39           |
| Non-diabetic   | 0               | 0.646                | 0.65046684   | 0.321          |
| Between groups | 1               | 2.129                | 0.85503806   | 0.187          |

\*P value calculated by Z-score

# Supplemental Table 12

Supplemental Table 12: Clusters with or without preproinsulin-specific TCR clonotypes

|              | Clusters containing preproinsulin-specific clonotypes |                   | Clusters not containing preproinsulin-specific clonotypes |                   |
|--------------|-------------------------------------------------------|-------------------|-----------------------------------------------------------|-------------------|
|              | T1D or AAb                                            | With Non-diabetic | T1D or AAb                                                | With Non-diabetic |
| CD4-Alpha    | 2                                                     | 0                 | 102                                                       | 33                |
| CD4-Beta     | 0                                                     | 1                 | 20                                                        | 6                 |
| CD8-Alpha    | 12                                                    | 2                 | 85                                                        | 68                |
| CD8-Beta     | 5                                                     | 0                 | 27                                                        | 29                |
| <b>Total</b> | <b>19</b>                                             | <b>3</b>          | <b>234</b>                                                | <b>136</b>        |
